# Supplementary figures and images for: A Newly Synthesized Rhamnoside Derivative Alleviates Alzheimer’s Amyloid-β-Induced Oxidative Stress, Mitochondrial Dysfunction, and Cell Senescence through Upregulating SIRT3
Source: Hindawi journal article supplement (doi:10.1155/2020/7698560), 2020-02-13

Fig.S4

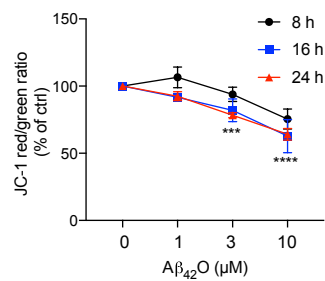

Supplement: f1 [file 7698560.f1.zip]

Fig.S5

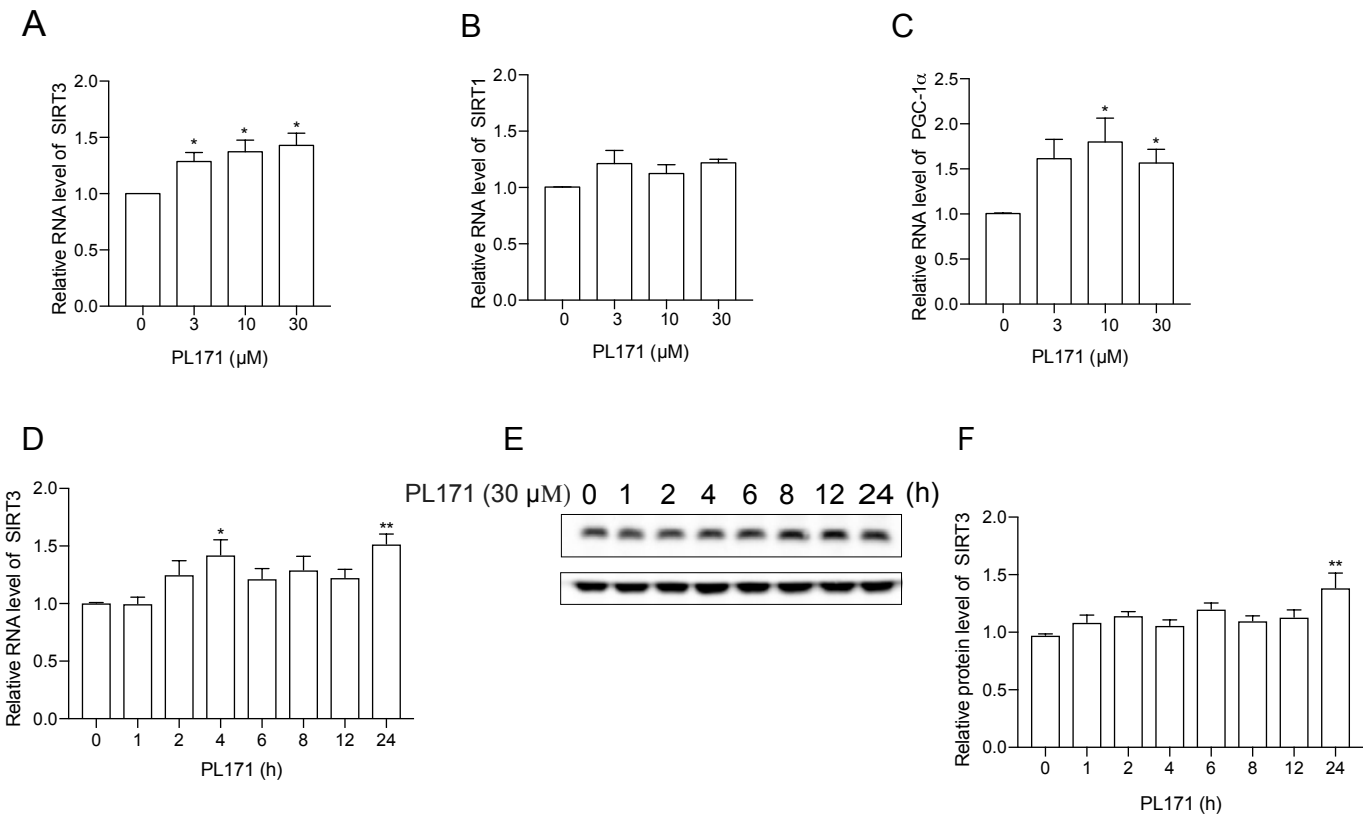

Supplement: f1 [file 7698560.f1.zip]
